# Supplementary material for: Mucosal and salivary microbiota associated with recurrent aphthous stomatitis
Source: PubMed Central journal article supplement (PMC4818471; doi:10.1186/s12866-016-0673-z), 2016-04-01
Supplement: 12866_2016_673_MOESM1_ESM.pdf [file 12866_2016_673_MOESM1_ESM.pdf]

Figure S1

A

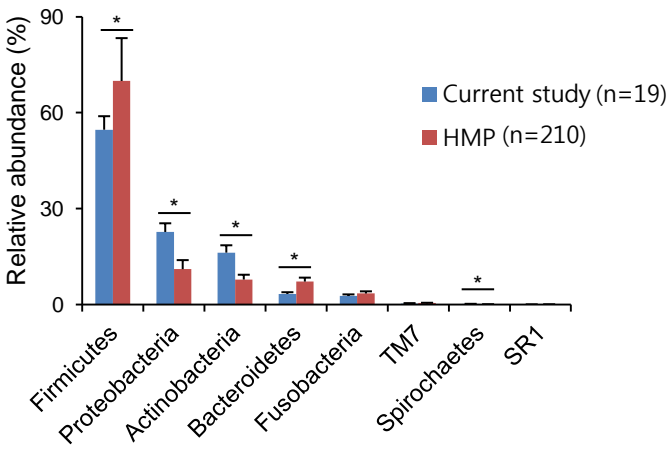

B

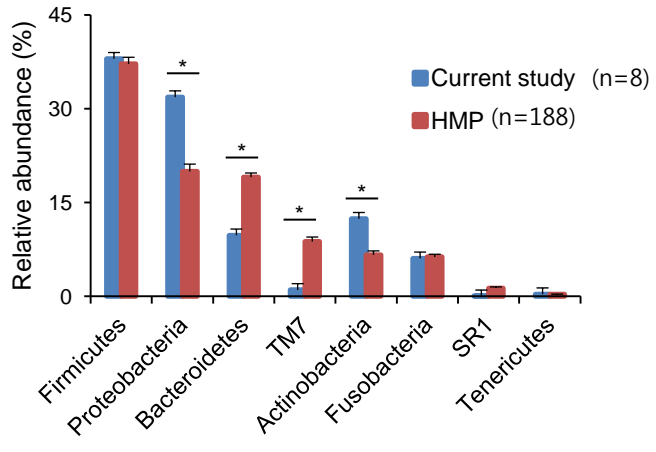

Dominant phyla observed in the mucosa (A) and saliva (B) of control subjects were compared with those published by Human Microbiome Project Consortium.

Figure S2

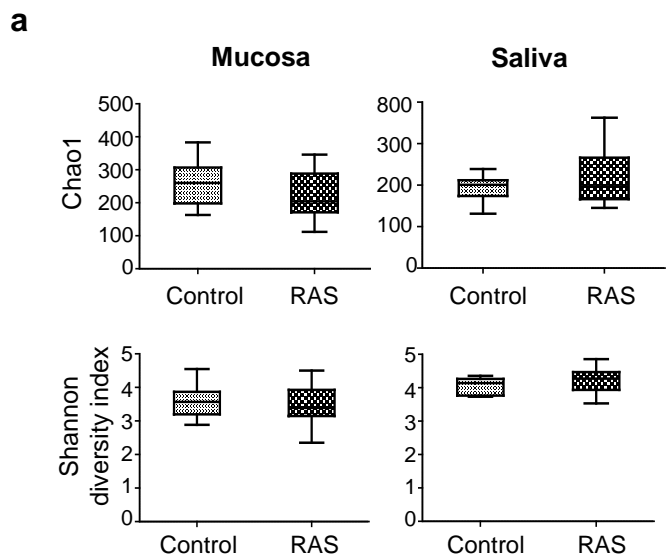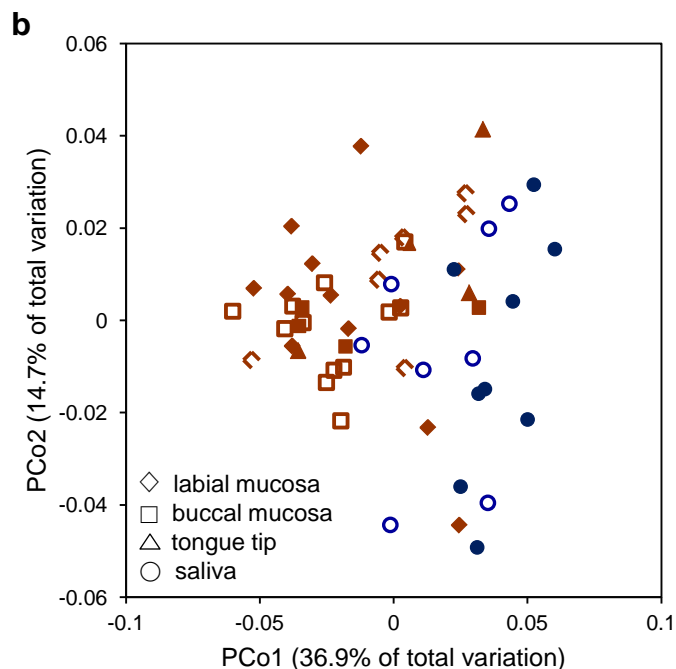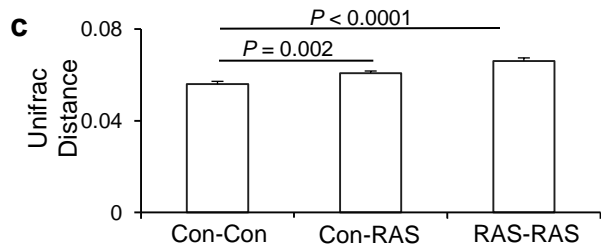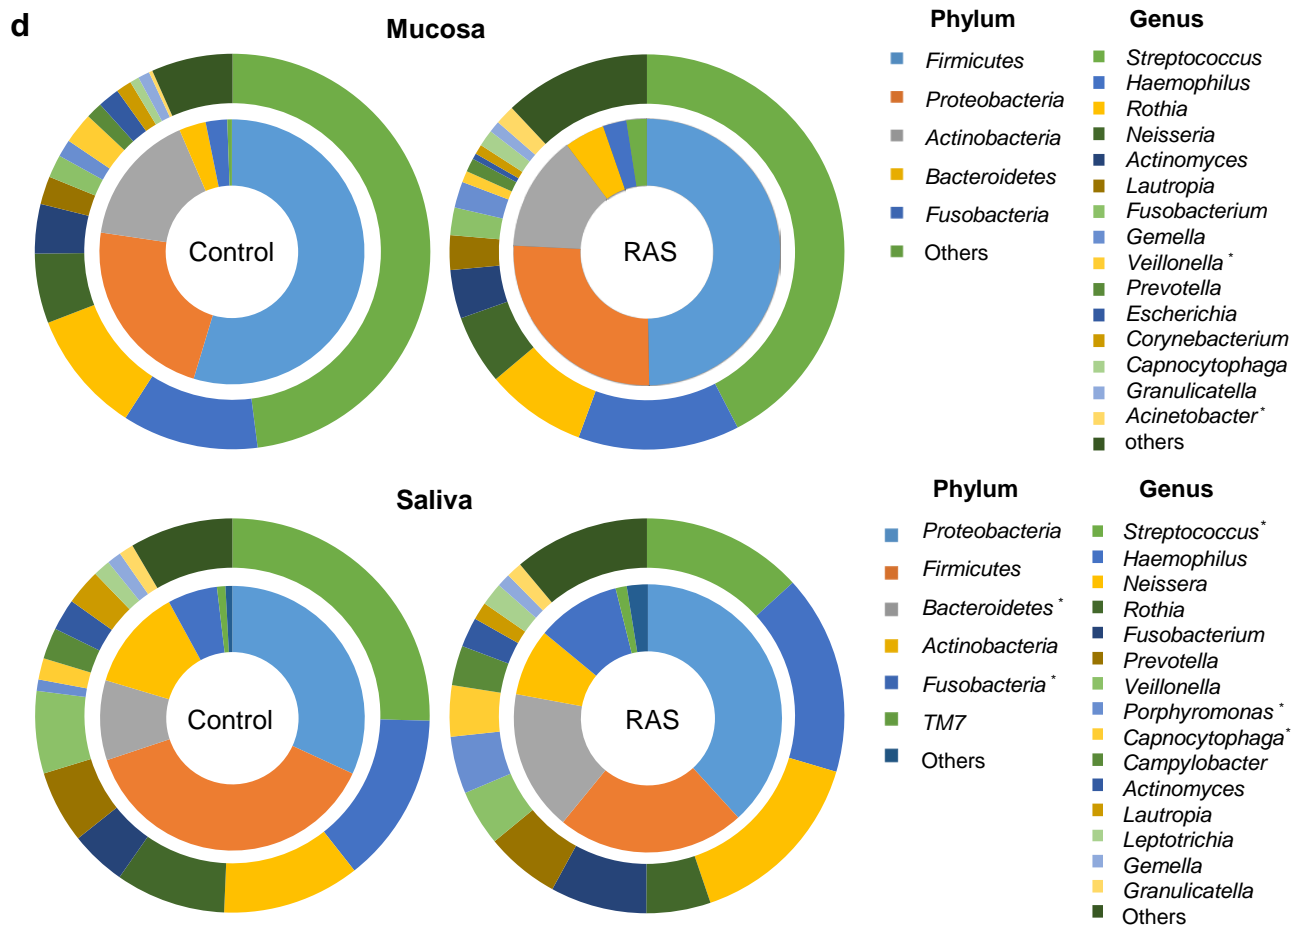



Table. 1 . The demographic data of control subjects and RAS patients.

|                                  | Control subjects (n = 19)                                  | RAS patients (n = 20)                                                          |
|----------------------------------|------------------------------------------------------------|--------------------------------------------------------------------------------|
| Sex                              | 9 males, 10 females                                        | 11 males, 9 females                                                            |
| Age                              | 44.1±3.5                                                   | 44.4±3.5                                                                       |
| Smoking history                  | 1 (5.3%)                                                   | 3 (15%)                                                                        |
| Ulcer numbers                    | -                                                          | Single: 13 (65%)<br>Multiple: 7 (35%)                                          |
| Sampling sites                   | Lip labial mucosa: 7 (36.8%),<br>Buccal mucosa: 12 (63.2%) | Lip labial mucosa: 4 (20%),<br>Buccal mucosa: 13 (65%)<br>Tongue tip: 3 (15%), |
| Unstimulated salivary flow rates | 0.46±0.08 ml/minute                                        | 0.63±0.07 ml/minute                                                            |

Table 2. Relative abundance of taxa differently distributed between controls and RAU in the mucosal microbiota.

|                                      | Controls (n= 19)             | RAU (n= 20)                       | <i>P</i> value    |               |
|--------------------------------------|------------------------------|-----------------------------------|-------------------|---------------|
| Genus                                | <i>Veillonella</i> ↓         | 1.82 (0.49-10.44)                 | 0.82 (0-3.33)     | 0.002         |
|                                      | <i>Acinetobacter</i> ↑       | 0 (0-2.54)                        | 0.79 (0-7.69)     | 0.001         |
|                                      | <i>Campylobacter</i> ↓       | 0.22 ( 0-1.07)                    | 0.08 (0-2.11)     | 0.035         |
|                                      | <i>Lachnoanaerobaculum</i> ↓ | 0.09 (0.02-0.87)                  | 0.04 (0-0.47)     | 0.007         |
|                                      | <i>Blautia</i> ↑             | 0 (0-0.24)                        | 0.02 (0-3.73)     | 0.002         |
|                                      | <i>Myxococcus</i> ↑          | 0 (0-0.14)                        | 0.04 (0-3.73)     | 0.006         |
|                                      | <i>Pseudomonas</i> ↑         | 0 (0-0.33)                        | 0.02 (0-2.28)     | 0.011         |
|                                      | <i>Atopobium</i> ↓           | 0.04 (0-0.44)                     | 0 (0-0.42)        | 0.025         |
|                                      | <i>Ruminococcus_g6</i> ↑     | 0 (0-0.55)                        | 0.02 (0-0.86)     | 0.012         |
|                                      | <i>Moryella</i> ↓            | 0.04 (0-0.45)                     | 0 (0-0.17)        | 0.001         |
|                                      | <i>Faecalibacterium</i> ↑    | 0 (0-0.09)                        | 0.01 (0-0.58)     | 0.012         |
|                                      | <i>Staphylococcus</i> ↑      | 0 (0-0.15)                        | 0.02 (0-0.28)     | 0.004         |
|                                      | <i>Streptococcaceae_uc</i> ↓ | 0.02 (0-0.06)                     | 0 (0-0.04)        | < 0.0005      |
|                                      | <i>Flavobacterium</i> ↑      | 0 (0-0)                           | 0 (0-0.38)        | 0.002         |
|                                      | Species                      | <i>Streptococcus salivarius</i> ↓ | 4.51 (0.08-18.08) | 0.52 (0-10.2) |
| <i>Veillonella dispar</i> ↓          |                              | 1.54 (0.29-5.30)                  | 0.49 (0-2.16)     | 0.001         |
| <i>Streptococcus parasanguinis</i> ↓ |                              | 1.32 (0-11.45)                    | 0.06 (0-0.98)     | 0.001         |
| <i>Acinetobacter oryzae</i> ↑        |                              | 0 (0-1.1)                         | 0.58 (0-5.88)     | 0.006         |
| <i>Actinomyces odontolyticus</i> ↓   |                              | 0.41 (0-1.73)                     | 0.11 (0-1.45)     | 0.009         |
| <i>Veillonella atypica</i> ↓         |                              | 0.06 (0-4.69)                     | 0 (0-0.97)        | 0.032         |
| <i>Prevotella melaninogenica</i> ↓   |                              | 0.12 (0.05-0.85)                  | 0.07 (0-0.69)     | 0.038         |
| <i>Acinetobacter johnsonii</i> ↑     |                              | 0 (0-0.54)                        | 0.2 (0-1.86)      | 0.001         |
| <i>FM997095_s</i> ↓                  |                              | 0.2 (0.01-1.35)                   | 0.03 (0-1.25)     | 0.003         |
| <i>Streptococcus_uc</i> ↓            |                              | 0.15 (0.03-1.35)                  | 0.05 (0-0.16)     | < 0.0005      |
| <i>Neisseria oralis</i> ↑            |                              | 0 (0-0.81)                        | 0.02 (0-1.83)     | 0.025         |
| <i>HQ757980_s</i> ↓                  |                              | 0.09 (0-1.15)                     | 0 (0-2.32)        | 0.008         |
| <i>Capnocytophaga granulosa</i> ↓    |                              | 0.03 (0-2.55)                     | 0 (0-0.79)        | 0.018         |
| <i>4P002811_s</i> ↓                  |                              | 0.06 (0-1.4)                      | 0.01 (0-0.42)     | 0.034         |
| <i>4P003152_s</i> ↓                  |                              | 0.06 (0-1.27)                     | 0 (0-0.09)        | 0.001         |
| <i>Streptococcus peroris</i> ↓       |                              | 0.075 (0-0.56)                    | 0.003 (0-0.4)     | 0.027         |
| <i>Campylobacter concisus</i> ↓      |                              | 0.1 (0-0.51)                      | 0.02 (0-0.14)     | 0.001         |
| <i>4P003193_s</i> ↓                  |                              | 0.02 (0-2.07)                     | 0 (0-0.47)        | 0.027         |
| <i>Prevotella histicola</i> ↓        |                              | 0.01 (0-2.29)                     | 0 (0-0.29)        | 0.007         |
| <i>Lachnoanaerobaculum orale</i> ↓   |                              | 0.07 (0.01-0.53)                  | 0.02 (0-0.45)     | 0.028         |
| <i>Streptococcus vestibularis</i> ↓  |                              | 0.02 (0-0.33)                     | 0 (0-1.25)        | < 0.0005      |
| <i>Streptococcus lactarius</i> ↓     |                              | 0.03 (0-0.87)                     | 0 (0-0.1)         | 0.011         |
| <i>Blautia wexlerae</i> ↑            |                              | 0 (0-0.24)                        | 0.02 (0-3.21)     | 0.001         |
| <i>Prevotella salivae</i> ↓          |                              | 0.01 (0-0.49)                     | 0 (0-0.96)        | 0.007         |
| <i>DQ447842_s</i> ↓                  |                              | 0.05 (0-0.32)                     | 0.006 (0-0.11)    | 0.035         |
| <i>4P002810_s</i> ↓                  |                              | 0.05 (0-0.38)                     | 0 (0-0.34)        | 0.013         |
| <i>Ruminococcus gnavus</i> ↑         |                              | 0 (0-0.53)                        | 0.02 (0-0.86)     | 0.014         |
| <i>Stomatobaculum longum</i> ↓       |                              | 0.03 (0-0.45)                     | 0 (0-0.17)        | 0.001         |
| <i>Bacteroides fragilis</i> ↑        |                              | 0 (0-0.29)                        | 0.004 (0-0.43)    | 0.013         |
| <i>BABG01000051_s</i> ↑              |                              | 0 (0-0.07)                        | 0.004 (0-0.52)    | 0.007         |
| <i>Streptococcaceae_uc_s</i> ↓       |                              | 0.02 (0-0.06)                     | 0 (0-0.04)        | 0< 0.0005     |

Table 3. Relative abundance of taxa differently distributed between controls and RAU<sub>AL</sub> in the salivary microbiota.

|         |                                      | Controls (n= 8)     | RAU <sub>AL</sub> (n= 9) | P value  |
|---------|--------------------------------------|---------------------|--------------------------|----------|
| Genus   | <i>Streptococcus</i> ↓               | 25.78 (12.10-44.24) | 13.05 (3.5-26.86)        | 0.034    |
|         | <i>Porphyromonas</i> ↑               | 0.51 (0.17-2.65)    | 3.43 (0.23-12.27)        | 0.016    |
|         | <i>Capnocytophaga</i> ↑              | 0.93 (0.19-6.43)    | 2.56 (1.55-10.43)        | 0.043    |
|         | <i>GU410548_g</i> ↑                  | 0.02 (0-0.03)       | 0.07 (0-4.72)            | 0.014    |
|         | <i>Abiotrophia</i> ↑                 | 0 (0-0.09)          | 0.04 (0-0.28)            | 0.017    |
|         | <i>Escherichia</i> ↓                 | 0.05 (0-0.17)       | 0 (0-0.03)               | 0.033    |
| Species | <i>AM420091_s</i> ↑                  | 0.24 (0-1.94)       | 1.53 (0.17-10.64)        | 0.043    |
|         | <i>Streptococcus salivarius</i> ↓    | 3.22 (0.76-10.42)   | 0.71 (0.03-3.84)         | 0.007    |
|         | <i>Streptococcus parasanguinis</i> ↓ | 0.98 (0.24-8.42)    | 0.33 (0.03- 1.11)        | 0.043    |
|         | <i>Capnocytophaga gingivalis</i> ↑   | 0.19 (0.04- 0.62)   | 0.73 (0.04- 3.5)         | 0.009    |
|         | <i>Neisseria flava</i> ↑             | 0 (0-0.1)           | 0.32 (0-6.99)            | 0.003    |
|         | <i>Rothia dentocariosa</i> ↓         | 0.97 (0.06-2.31)    | 0.28 (0-0.69)            | 0.043    |
|         | <i>HQ767899_s</i> ↓                  | 0.44 (0.02-2.97)    | 0.04 (0-1.29)            | 0.034    |
|         | <i>Aggregatibacter segnis</i> ↑      | 0.03 (0-0.19)       | 0.28 (0-2.65)            | 0.023    |
|         | <i>Capnocytophaga sputigena</i> ↑    | 0.05 (0-0.2)        | 0.36 (0.06-1.62)         | 0.003    |
|         | <i>4P003196_s</i> ↑                  | 0.04 (0.01-0.42)    | 0.14 (0.1- 2.09)         | 0.021    |
|         | <i>Neisseria sicca group</i> ↓       | 0.25 (0-6.62)       | 0 (0-0)                  | < 0.0005 |
|         | <i>Actinomyces viscosus</i> ↓        | 0.05 (0-1.37)       | 0 (0-0.16)               | 0.028    |
|         | <i>HQ757980_s</i> ↓                  | 0.1 (0.03-0.88)     | 0 (0-0.74)               | 0.032    |
|         | <i>4P004176_s</i> ↑                  | 0 (0-0.03)          | 0.04 (0-0.23)            | 0.015    |
|         | <i>Porphyromonas catoniae</i> ↑      | 0 (0-0.01)          | 0.03 (0-0.23)            | 0.029    |
|         | <i>Escherichia coli group</i> ↓      | 0.06 (0-0.17)       | 0 (0-0.03)               | 0.033    |
|         | <i>AM420214_s</i> ↑                  | 0 (0-0.01)          | 0.01 (0- 0.13)           | 0.021    |
